# Supplementary material for: Diagnostic accuracy of modified Hadlock formula for fetal macrosomia in women with gestational diabetes and pregnancy weight gain above recommended
Source: publisher site journal article supplement (doi:10.1515/jpm-2021-0013), 2021-04-16
Supplement: Supplementary file 1 [file j_jpm-2021-0013_suppl_001.docx]

Dear Editor-in-Chief,

A group of authors from several Croatian healthcare centers conducted a study aimed at describing the diagnostic accuracy of the formula for estimating fetal weight in those fetuses who are assumed to be macrosomic more often. The specificity of the formula is that it was not created based on usual regression models. Moreover, it was created in the pilot study with pregnant women who suffered from gestational diabetes whose weight gain during pregnancy was above recommended. The newborns’ weight from the pilot study was used as the gold standard for adjusting the coefficients to fetal biometric parameters. The diagnostic accuracy of the modified formula was verified by a larger study which took a relatively long time due to very strict inclusion / exclusion criteria. The methodology of the study itself is described in great detail and it is presented in accordance with guidelines for studies of diagnostic accuracy (STARD). We have shown that the modified formula has higher precision at larger fetal weights compared to the Hadlock 2-formula (which is one of the most commonly used formulas). The given result is very important, at least in the population of pregnant women whose children are expected to have a higher birthweight (global obesity pandemic and around 15% of pregnancies burdened with gestational diabetes). With all the mentioned above, we consider this study a good contribution to a hitherto unresolved issue, and the results are worth publishing. The authors declare no conflict of interest. This study has not been sent to any other journal, nor has any part of the study been published before. We have chosen the Journal of Perinatal Medicine based on its scope and the topic of our study. Since the STARD guidelines require a detailed presentation of the research methodology, the article has 4000 words at the expense of this part of the text. The authors agree that reducing any part of the text would result in less meaningful text and reduced credibility of the text and ask the Editorial board for understanding. We truly hope you will consider this study and accept it for further procedure.

Yours faithfully,

Boris Lovric

Sinisa Sijanovic

Josko Lesin

Josip Juras
