# Supplementary material for: Diagnostic accuracy of modified Hadlock formula for fetal macrosomia in women with gestational diabetes and pregnancy weight gain above recommended
Source: publisher site journal article supplement (doi:10.1515/jpm-2021-0013), 2021-04-16
Supplement: Supplementary file 2 [file j_jpm-2021-0013_suppl_003.docx]

No reference standard,

n=0

No reference standard,

n=0

Index test negative

n=96

Index test positive

n=37

Index test inconclusive

n=0

Potentially eligible patients n=213

Excluded, n=80

fetal congenital malformation, n=1;

overt diabetes, n=5;

preterm delivery, n=7;

fetal biometry done more than 3 days before delivery, n=14;

rupture of membranes more than three days before fetal biometry, n=2;

small for gestational age <10th centile, n=4;

normal weight gain during pregnancy, n=36;

delivery in another maternity ward, n=9;

Eligible patients

n=133

Index test

n=133

Reference standard (Hadlock)

n=99

Reference standard (Hadlock)

n=34

Final diagnosis

- *Targt condition present, n=36*
- *Target condition absent, n=1*
- *Target condition inconclusive, n=0*

Final diagnosis

- *Targt condition present, n=14*
- *Target condition absent, n=82*
- *Target condition inconclusive, n=0*
